# Supplementary material for: Impact of the MICA-129Met/Val Dimorphism on NKG2D-Mediated Biological Functions and Disease Risks
Source: PubMed Central journal article supplement (PMC5149524; doi:10.3389/fimmu.2016.00588), 2016-12-12
Supplement: table_1.pdf [file table_1.pdf]

## Supplementary Material

# Impact of the MICA-129Met/Val dimorphism on NKG2D-mediated biological functions and disease risks

Antje Isernhagen, Dörthe Malzahn, Heike Bickeböller, Ralf Dressel

**Supplementary Table 1:** MICA-129Met/Val disease association studies.

| Study and reference                               | Population             | Controls | Met allele frequency in controls | Disease                                     | Patients                 | Risk allele | OR         | 95%-CI    | p-value <sup>a</sup>  | Risk genotype | OR      | 95%-CI    | p-value <sup>a</sup>         |                       |
|---------------------------------------------------|------------------------|----------|----------------------------------|---------------------------------------------|--------------------------|-------------|------------|-----------|-----------------------|---------------|---------|-----------|------------------------------|-----------------------|
| 1. Amroun 2005 (26)                               | Algeria                | 76       | 62 %                             | Ankylosing spondylitis                      | 129                      | Met         | 2.57       | 1.29-5.1  | P <sub>c</sub> =0.006 | Met/Met       |         |           | P=0.0001 (HLA-B27 dependent) |                       |
|                                                   |                        |          |                                  | Juvenile ankylosing spondylitis (<15 years) | 38                       |             |            |           |                       |               |         | Met/Met   | 2.29                         | 1.04-5.02             |
| 2. Boukouaci 2009 (36)                            | France                 |          | 27 % (donors)                    | HSCT (with HLA-identical sibling donor)     | 211                      |             |            |           |                       | Val/Val       | 1.61    | 1.08-2.40 | P=0.019                      |                       |
|                                                   |                        |          |                                  | occurrence of chronic GVHD                  | 100 events, 111 censored |             |            |           |                       |               | Met/Met | 2.69      | 1.12-6.43                    | P=0.02                |
| 3. Douik 2009 (33)                                | Tunisia                | 180      | 27 %                             | Nasopharyngeal carcinoma                    | 130                      | –           |            |           | ns                    | Val/Val       | 1.87    | 1.14-3.04 | P <sub>c</sub> =0.02         |                       |
| 4. Kirsten 2009 (27) (indirect LD with rs1051794) | France (family trios)  | 400      | 33 %                             | Rheumatoid arthritis                        | 200                      | Val         | 0.56 (Met) | 0.38-0.83 | P=0.003               |               |         |           |                              |                       |
|                                                   | Germany (case-control) | 182      | 33 %                             | Rheumatoid arthritis                        | 90                       | Val         | 0.60 (Met) | 0.37-0.96 | P=0.032               |               |         |           |                              |                       |
| 5. López-Hernández 2010 (30)                      | Spain                  | 154      | 38 %                             | Inflammatory bowel disease                  | 88                       | –           |            |           | ns                    |               |         |           |                              |                       |
|                                                   |                        |          |                                  | Crohn's disease                             | 59                       | –           |            |           | ns                    |               |         |           |                              |                       |
|                                                   |                        |          |                                  | Ulcerative colitis                          | 29                       | –           |            |           | ns                    |               | Met/Met |           |                              | P <sub>c</sub> =0.028 |
| 6. Yoshida 2011 (28)                              | Japan                  | 351      | 29 %                             | Systemic lupus erythematosus                | 716                      | Met         | 1.3        | 1.1-1.6   | P <sub>c</sub> =0.01  | Met/Met       | 1.8     | 1.2-2.6   | P <sub>c</sub> =0.02         |                       |
|                                                   |                        |          |                                  | Rheumatoid arthritis                        | 327                      | –           |            |           | ns                    |               | –       |           |                              | ns                    |

| Study and reference      | Population               | Controls | Met allele frequency in controls | Disease                                  | Patients   | Risk allele | OR                   | 95%-CI                 | p-value <sup>a</sup> | Risk genotype | OR                     | 95%-CI                 | p-value <sup>a</sup> |           |          |    |
|--------------------------|--------------------------|----------|----------------------------------|------------------------------------------|------------|-------------|----------------------|------------------------|----------------------|---------------|------------------------|------------------------|----------------------|-----------|----------|----|
| 7. Zhao 2011 (25)        | China                    | 560      | 28 %                             | Ulcerative colitis                       | 272        | Val         | 1.35                 | 1.06-1.72              | P=0.015              | Val/Val       | 1.59                   | 1.14-2.05              | P=0.005              |           |          |    |
|                          |                          |          |                                  | extensive v. distal UC                   | 78 v. 194  |             |                      |                        |                      |               | Met carrier (Val/ Val) | 0.59                   | 0.32-0.94            | P=0.03    |          |    |
|                          |                          |          |                                  | severe v. other UC                       | 34 v. 238  |             |                      |                        |                      |               | Val/Val                | 0.43 (Met carrier)     | 0.19-0.97            | P=0.04    |          |    |
| 8. Raache 2012 (31)      | Algeria                  | 75       | 35 %                             | Type I diabetes                          | 30         | Val         | 1.92                 | 0.92-4.21 <sup>b</sup> | Pc=0.034             | Val/Val       | 2.13                   | 0.83-5.57 <sup>b</sup> | Pc=0.043             |           |          |    |
|                          |                          |          |                                  | LADA                                     | 43         | Val         | 2.51                 | 1.27-5.18              | Pc=0.002             | Val/Val       | 2.94                   | 1.25-7.02              | Pc=0.003             |           |          |    |
| 9. Pollock 2013 (32)     | Canada (Toronto)         | 547      | 27 %                             | Cutaneous psoriasis                      | 340        | Met         | 1.5                  | 1.2-2.1                | P<0.001              | Met/Met       | 3.4                    | 2.0-5.8                | P<0.0001             |           |          |    |
|                          | Canada (St. John's)      | 115      | 26 %                             | Psoriatic arthritis                      | 374        | Met         | 1.6                  | 1.0-2.4                | P=0.035              | –             | –                      | –                      | ns                   |           |          |    |
| 10. Tong 2013 (34)       | Vietnam                  | 418      | 37 %                             | HBV infection                            | 552        | –           | –                    | –                      | ns                   | –             | –                      | –                      | ns                   |           |          |    |
|                          |                          |          |                                  | HCC v. non-HCC                           | 166 v. 386 | Met         | 1.5                  | 1.1-2.0                | P=0.009              | Met/Met       | 2.3                    | 1.3-4.2                | P=0.006              |           |          |    |
| 11. Achour 2014 (29)     | Tunisia                  | 123      | 25 %                             | Rheumatoid Arthritis                     | 142        | –           | –                    | –                      | ns                   | –             | –                      | –                      | ns                   |           |          |    |
|                          |                          |          |                                  | RF+ v. RF-                               | 89 v. 38   | Val         | 2.35                 | 1.3-4.26               | Pc=0.021             | Val/Val       | 3.49                   | 1.58-7.73              | Pc=0.0095            |           |          |    |
| 12. Hizem 2014 (40)      | Tunisia                  | 334      | 27 %                             | Recurrent miscarriage                    | 312        | –           | –                    | –                      | ns                   | –             | –                      | –                      | ns                   |           |          |    |
| 13. Ayo 2015 (38)        | Brazil                   |          |                                  | LVSD in chronic Chargas heart disease    | 189        | –           | –                    | –                      | –                    | –             | –                      | –                      | –                    |           |          |    |
|                          |                          |          |                                  | severe LSVD v. no LSVD                   | 48 v. 93   | Met         | 2.38                 | 1.43-3.96              | P=0.001              | Met/Met       | 4.09                   | 1.49-11.24             | P=0.007              |           |          |    |
| 14. Ayo 2015 (39)        | Brazil                   |          |                                  | Ocular Toxoplasmosis presence v. absence | 297        | –           | –                    | –                      | ns                   | –             | –                      | –                      | ns                   |           |          |    |
| 15. Campillo 2015 (35)   | Spain                    | 200      | 36 %                             | Cutaneous malignant melanoma             | 233        | –           | –                    | –                      | ns                   | –             | –                      | –                      | ns                   |           |          |    |
| 16. Isernhagen 2015 (37) | Germany                  |          | 32 % (donors)                    | HSCT                                     | 452        | –           | –                    | –                      | –                    | –             | –                      | –                      | –                    |           |          |    |
|                          |                          |          |                                  | occurrence of acute GVHD                 | 246 v. 192 | –           | –                    | –                      | –                    | –             | –                      | Met/Met                | 1.92                 | 1.05-3.63 | P=0.0371 |    |
|                          |                          |          |                                  | mortality due to acute GVHD              | 44 v 202   | Val         | 0.57 (Met, additive) | 0.32-0.95              | P=0.0400             | –             | –                      | –                      | –                    | –         | –        |    |
|                          |                          |          |                                  | occurrence of chronic GVHD               | 138 v. 302 | –           | –                    | –                      | –                    | –             | –                      | –                      | –                    | –         | –        | ns |
|                          |                          |          |                                  | relapse of malignancy                    | 86 v. 366  | –           | –                    | –                      | –                    | –             | –                      | –                      | –                    | –         | –        | ns |
| overall survival         | 141 events, 305 censored | Val      | 0.77 (Met, additive)             | 0.60-0.99                                | P=0.0445   | –           | –                    | –                      | –                    | –             | –                      | –                      |                      |           |          |    |

Abbreviations: GVHD, graft versus host disease; HBV, hepatitis B virus; HCC, hepatocellular carcinoma; HLA, human leukocyte antigen; HSCT, hematopoietic stem cell transplantation; LADA, latent autoimmune diabetes in adults; LD, linkage disequilibrium; LSVD; left ventricular systolic dysfunction; RF, rheumatoid factor; UC, ulcerative colitis.

<sup>a</sup>P denotes nominal p-values. Pc denotes Bonferroni corrected p-values. Effect strengths with 95% confidence intervals (95%-CI) are odds ratio's (OR) except for Boukouaci et al. 2009 (36) and Isernhagen et al. 2015 (37) (overall survival) who estimated hazard ratio's in event-time data.

<sup>b</sup>As stated by Raache et al. 2012 (31).
